# Supplementary material
Source: HighWire-hosted journal article supplement (https://bmjopenquality.bmj.com/content/10/1/e001140)

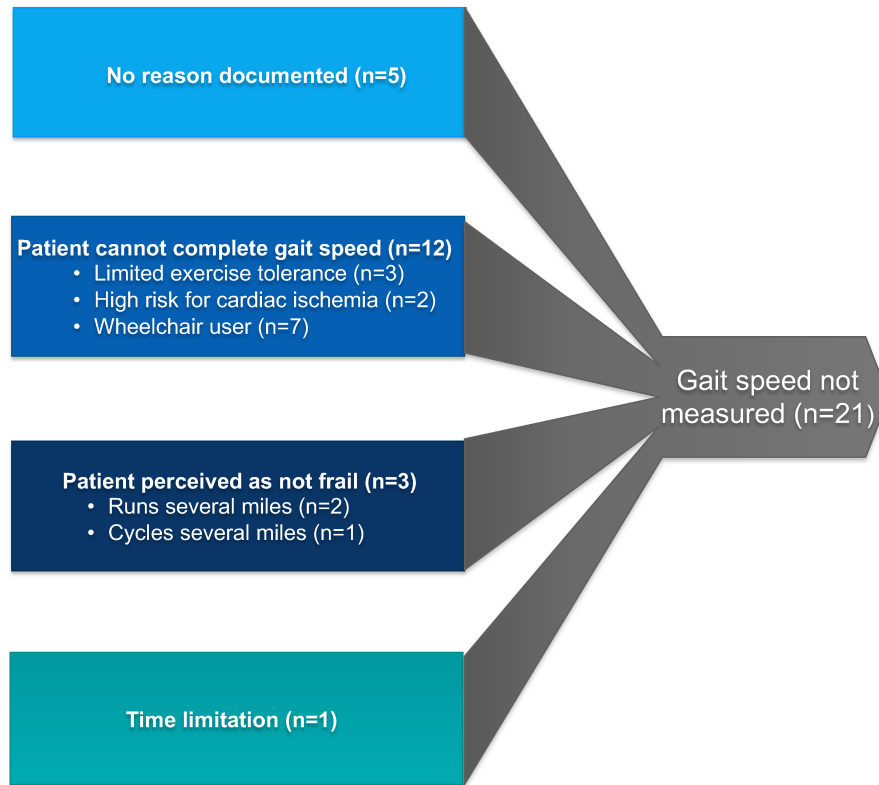

Appendix Figure 1: Reasons for not measuring gait speed during clinic visits

Supplement: inline-supplementary-material-1 [file inline-supplementary-material-1.pdf]
